# Supplementary material for: Patterns of Young Adult Social Roles Transitions Across 24 Months and Subsequent Substance Use and Mental Health
Source: Springer Nature journal article supplement (doi:10.1007/s10964-019-01134-8), 2019-10-07
Supplement: MOESM1 [file 17248712]

Supplemental Table. Rate ratios for count outcomes according to latent classes, adjusted for covariatesa

|  | AUDIT score | | | CUDIT score | | | PHQ-9 score | | | GAD score | | |
| --- | --- | --- | --- | --- | --- | --- | --- | --- | --- | --- | --- | --- |
|  | RR | 95% CI | p-value | RR | 95% CI | p-value | RR | 95% CI | p-value | RR | 95% CI | p-value |
| Latent Classb |  |  |  |  |  |  |  |  |  |  |  |  |
| 1 (ref) | -- | -- | -- | -- | -- | -- | -- | -- | -- | -- | -- | -- |
| 2 | 1.16 | 1.00, 1.34 | 0.049 | 0.93 | 0.73, 1.18 | 0.539 | 0.99 | 0.84, 1.17 | 0.929 | 1.11 | 0.94, 1.32 | 0.223 |
| 3 | 1.34 | 1.15, 1.56 | <0.001 | 1.51 | 1.19, 1.92 | 0.001 | 1.26 | 1.06, 1.49 | 0.007 | 1.32 | 1.1, 1.58 | 0.002 |

a Covariates were baseline age, sex, Hispanic ethnicity, parental education completed, living with parents at baseline, serious relationship at baseline, attending 2- or 4-year college at baseline, working part- or full-time at baseline, baseline level of the outcome

b Latent Classes: 1) Infrequent Transitions, 2) Transitions except in Relationships, 3) Frequent Transitions
